# Supplementary material
Source: PubMed Central journal article supplement (PMC5427180)
Supplement: NIHMS72477-supplement-Supplementary_data.pdf [file NIHMS72477-supplement-Supplementary_data.pdf]

Supplementary material

**Infant weight growth velocity patterns and general and abdominal adiposity  
in school-age children. The Generation R Study**

Infant weight growth and adiposity at school-age

Claudia J. Kruithof<sup>1,2</sup> MSc, Olta Gishti<sup>1,2,3</sup> MD, PhD, Albert Hofman<sup>2</sup> MD, PhD,

Romy Gaillard<sup>1,2,3</sup> PhD, Vincent W.V. Jaddoe<sup>1,2,3</sup> MD, PhD

<sup>1</sup>The Generation R Study Group, Erasmus MC, University Medical Center, Rotterdam, The Netherlands;

<sup>2</sup>Department of Epidemiology, Erasmus MC, University Medical Center, Rotterdam, The Netherlands;

<sup>3</sup>Department of Pediatrics, Erasmus MC, University Medical Center Rotterdam, The Netherlands

**Included in the Online Supplementary Material:**

Procedure to derive peak weight velocity and adiposity peak.

Figure S1. Flow chart of participants in study.

Table S1. Non-response analysis (N=6,843).

Table S2. Correlation coefficients between infant weight growth and childhood adiposity outcomes (N=5,126).

Table S3. Associations of infant weight growth velocity patterns with adiposity outcomes in absolute values (N=5,126).

Table S4. Associations of infant weight growth velocity patterns with childhood adiposity outcomes adjusted for age and sex only (N=5,126).

Table S5. Interaction with standard deviation score birth weight and gestational age at birth.

Table S6. Associations of infant weight growth velocity patterns with adiposity outcomes stratified by gestational age at birth or SDS birth weight (N=5,126).

## 1 **Peak weight velocity**

2 PWV was derived from postnatal growth data using the Reed1 model for boys and girls  
3 separately using the previously described procedure (1, 2). The Reed1 model was chosen since it  
4 showed a better fit to the early growth data than the Kouchi, Carlberg, and Count models, and it  
5 showed an equally good fit to the Reed2 model which has one more parameter than the Reed1  
6 model (3). The difference compared with the simpler models, for example, the Count model, is  
7 that the Reed1 model allows the velocity to peak after birth, whereas other models force it to  
8 peak at birth. In the first couple of weeks after birth, weight may drop up to 10% in normal  
9 individuals. The PWV is thus usually not in the first weeks after birth, but slightly later.  
10 Therefore, the Reed1 model is more realistic (especially for weight) and more flexible. The  
11 Reed1 model was fitted by sex on all weight measurements taken at 0-3 years of age, including  
12 birth weight. We assumed both a fixed and a random component for all our parameters in the  
13 model. For each person, the first derivative of the fitted distance curve was taken to obtain the  
14 weight velocity curve. Subsequently, the maximum of this curve was taken to obtain the PWV in  
15 infancy. The Reed1 model is a four-parameter extension of the three-parameter Count model  
16 and its functional form is (3, 4) :  $Y = A + Bt + C\ln(t) + D/t$   
17 Since this model is not defined at birth ( $t=0$ ), it was modified for this study in the same way as in  
18 Simondon et al. (5):  $Y = A + Bt + C\ln(t+1) + D/(t+1)$  where  $t$ , postnatal age;  $Y$ , weight reached  
19 at age  $t$  and  $A$ ,  $B$ ,  $C$ , and  $D$  the function parameters. Of the function parameters,  $A$  is related to  
20 the baseline weight at birth,  $B$  to the linear component of the growth velocity,  $C$  to the decrease  
21 in the growth velocity over time, and  $D$  to the inflection point that allows growth velocity to peak  
22 after birth rather than exactly at birth. The Reed1 model is linear in its constants (4).

23

## 24 **Adiposity peak**

25 For BMIAP, a cubic mixed effects model was previously fitted on  $\log(\text{BMI})$  from 14 days to 1.5  
26 years, using sex as a covariate (1). Modelization of BMI growth was performed from the age of  
27 14 days onward, since children may lose up to 10% of their body weight in the first 2 weeks of  
28 life. When fitting the model, age was centralized to 0.75 years. In addition to fixed effects, we  
29 included random effects for the constant and the slope in the model. An autoregressive within  
30 person correlation structure between measurements was assumed. Then, BMI was derived for  
31 each individual at the point where the curve reaches its maximum, i.e. at infant adiposity peak.

## References

1. Tzoulaki I, Sovio U, Pillas D, Hartikainen AL, Pouta A, Laitinen J, et al. Relation of immediate postnatal growth with obesity and related metabolic risk factors in adulthood: the northern Finland birth cohort 1966 study. *Am J Epidemiol* 2010; **171**: 989-998.
2. Sovio U, Bennett AJ, Millwood IY, Molitor J, O'Reilly PF, Timpson NJ, et al. Genetic determinants of height growth assessed longitudinally from infancy to adulthood in the northern Finland birth cohort 1966. *PLoS Genet* 2009; **5**: e1000409.
3. Berkey CS, Reed RB. A model for describing normal and abnormal growth in early childhood. *Hum Biol* 1987; **59**: 973-987.
4. L. HRM. Parametric models for postnatal growth. In: Eds RC Hauspie NCLM (ed). In *Methods in Human Growth Research*, pp 205-233: Cambridge: Cambridge University press, 2004.
5. Simondon KB SF, Delpuech F & Cornu A. Comparative study of five growth models applied to weight data from congolese infants between birth and 13 months of age. *American Journal of Human Biology* 1992; **4**: 372-335.

**Figure S1. Flow chart of participants in study**

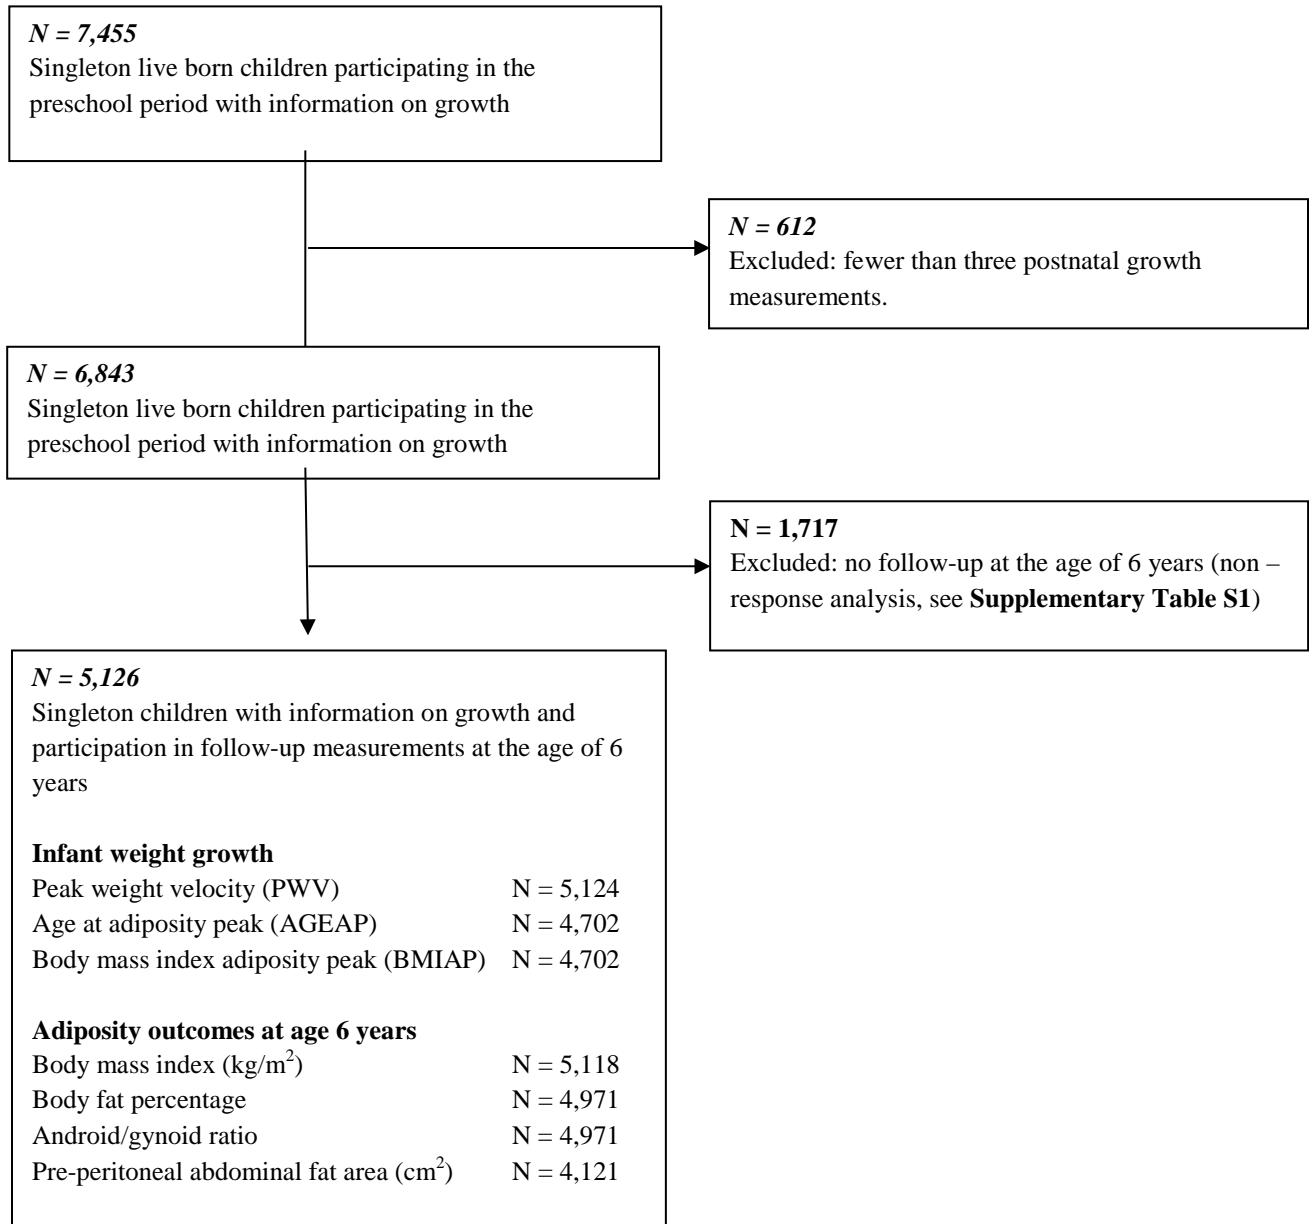

**Table S1. Non-response Analysis (N=6,843)**

|                                 | <b>Eligible for<br/>present study<br/>(N=6,843)</b> | <b>Included in<br/>analysis<br/>Yes<br/>(N=5,126)</b> | <b>Included in<br/>analysis<br/>No<br/>(N=1,717)</b> | <i>P value</i> |
|---------------------------------|-----------------------------------------------------|-------------------------------------------------------|------------------------------------------------------|----------------|
| <b>Maternal characteristics</b> |                                                     |                                                       |                                                      |                |
| Age (years)                     | 31.1 (23.1, 36.7)                                   | 31.5 (24.0, 36.9)                                     | 29.5 (21.6, 35.9)                                    | <0.01          |
| Height (cm)                     | 167.7 (7.4)                                         | 168.0 (7.4)                                           | 166.9 (7.6)                                          | <0.01          |
| <i>Missing</i>                  | 8.6                                                 | 8.6                                                   | 8.6                                                  |                |
| Weight (kg)                     | 66.3 (12.3)                                         | 66.4 (12.2)                                           | 65.7 (12.7)                                          | 0.07           |
| <i>Missing</i>                  | 24.5                                                | 23.8                                                  | 26.6                                                 |                |
| BMI (kg/m <sup>2</sup> )        | 22.6 (19.4, 29.1)                                   | 22.6 (19.4, 28.9)                                     | 22.4 (19.1, 29.4)                                    | 0.94           |
| <i>Missing</i>                  | 24.6                                                | 23.9                                                  | 26.6                                                 |                |
| Parity (%)                      |                                                     |                                                       |                                                      | <0.01          |
| 0                               | 55.7                                                | 56.9                                                  | 52.1                                                 |                |
| >= 1                            | 44.3                                                | 43.1                                                  | 47.9                                                 |                |
| <i>Missing</i>                  | 2.6                                                 | 2.5                                                   | 3.0                                                  |                |
| Marital status (%)              |                                                     |                                                       |                                                      | <0.01          |
| No partner                      | 12.1                                                | 10.8                                                  | 16.3                                                 |                |
| Married/living together         | 87.9                                                | 89.2                                                  | 83.7                                                 |                |
| <i>Missing</i>                  | 8.9                                                 | 6.9                                                   | 14.0                                                 |                |
| Educational level (%)           |                                                     |                                                       |                                                      |                |
| Primary                         | 8.9                                                 | 7.6                                                   | 13.3                                                 | <0.01          |
| Secondary                       | 42.4                                                | 41.1                                                  | 46.4                                                 | <0.01          |
| Higher                          | 48.7                                                | 51.3                                                  | 40.2                                                 | <0.01          |
| <i>Missing</i>                  | 8.3                                                 | 6.6                                                   | 13.6                                                 |                |
| Smoking during pregnancy (%)    |                                                     |                                                       |                                                      | <0.01          |
| Ever                            | 16.1                                                | 14.9                                                  | 20.1                                                 |                |
| Never                           | 83.9                                                | 85.1                                                  | 79.9                                                 |                |
| <i>Missing</i>                  | 12.6                                                | 11.5                                                  | 15.6                                                 |                |
| Alcohol consumption (%)         |                                                     |                                                       |                                                      | <0.01          |
| Ever                            | 54.8                                                | 57.7                                                  | 54.0                                                 |                |
| Never                           | 45.2                                                | 42.3                                                  | 46.0                                                 |                |
| <i>Missing</i>                  | 19.5                                                | 19.1                                                  | 20.4                                                 |                |
| Folic acid supplement use (%)   |                                                     |                                                       |                                                      | <0.01          |
| No                              | 24.4                                                | 21.7                                                  | 32.6                                                 |                |
| Yes                             | 75.6                                                | 78.3                                                  | 67.4                                                 |                |
| <i>Missing</i>                  | 30.2                                                | 29.3                                                  | 32.7                                                 |                |
| Maternal complications (%)      |                                                     |                                                       |                                                      |                |
| Gestational diabetes, Yes       | 0.8                                                 | 0.7                                                   | 1.0                                                  | 0.31           |
| Gestational hypertension, Yes   | 3.8                                                 | 3.6                                                   | 2.8                                                  | <0.05          |
| Preeclampsia, Yes               | 1.9                                                 | 1.7                                                   | 2.5                                                  | 0.06           |

**Paternal characteristics**

|                          |                   |                   |                   |       |
|--------------------------|-------------------|-------------------|-------------------|-------|
| Age (y)                  | 33.1 (26.5, 39.7) | 33.2 (27.0, 40.2) | 32.0 (24.7, 38.6) | <0.01 |
| <i>Missing</i>           | 30.6              | 28.2              | 37.9              |       |
| Height (cm)              | 182 (7.8)         | 182.1 (7.8)       | 181.4 (7.7)       | <0.01 |
| <i>Missing</i>           | 30.7              | 28.2              | 37.9              |       |
| Weight (kg)              | 83.9 (12.9)       | 84.0 (12.8)       | 82.3 (13.1)       | 0.15  |
| <i>Missing</i>           | 30.8              | 28.3              | 38.0              |       |
| BMI (kg/m <sup>2</sup> ) | 25.2 (21.2, 29.4) | 24.9 (21.2, 29.4) | 25.0 (21.2, 29.4) | 0.35  |
| <i>Missing</i>           | 30.8              | 28.3              | 38.1              |       |

**Infant characteristics**

|                                        |                   |                   |                   |       |
|----------------------------------------|-------------------|-------------------|-------------------|-------|
| Gestational age (weeks)                | 40.1 (38.0, 41.7) | 40.1 (38.0, 41.7) | 40.0 (38.0, 41.7) | 0.20  |
| Birth weight (g)                       | 3439 (548)        | 3447 (543)        | 3414 (562)        | <0.05 |
| Ethnicity (%)                          |                   |                   |                   | <0.01 |
| Dutch or European                      | 65.8              | 68.0              | 58.5              |       |
| Non- European                          | 34.2              | 32.0              | 41.5              |       |
| <i>Missing</i>                         | 3.8               | 1.5               | 10.4              |       |
| Duration of breastfeeding              | 3.5 (0.0, 12.0)   | 3.6 (0.5, 10.8)   | 2.5 (0.0, 10.5)   | <0.01 |
| Age at introduction of solid foods (%) |                   |                   |                   |       |
| < 4 months                             | 8.3               | 8.0               | 9.8               | 0.12  |
| 4 – 5 months                           | 61.3              | 61.0              | 62.7              | 0.40  |
| 5 – 6 months                           | 26.4              | 26.8              | 24.2              | 0.14  |
| > 6 months                             | 3.9               | 4.1               | 3.3               | 0.29  |
| <i>Missing</i>                         | 42.2              | 37.2              | 57.2              |       |
| PWV (kg/year)                          | 12.3 (2.2)        | 12.2 (2.1)        | 12.5 (2.2)        | <0.01 |
| AGEAP (years)                          | 0.7 (0.7, 0.8)    | 0.7 (0.7, 0.8)    | 0.7 (0.7, 0.8)    | 0.22  |
| BMIAP (kg/m <sup>2</sup> )             | 17.6 (16.6, 18.7) | 17.6 (16.6, 18.7) | 17.6 (16.6, 18.6) | 0.09  |

---

Abbreviations; N: number. BMI: body mass index, PWV: peak weight velocity, AGEAP: age at adiposity peak, BMIAP: body mass index at adiposity peak. Values are means (standard deviation), percentages or medians (90% range) for variables with skewed distribution. Non-imputed data. P-value (included in analysis: yes versus no) was estimated by using One-Way Anova test and Chi-square tests.



**Table S2. Correlation coefficients between infant weight growth and childhood adiposity outcomes (N=5,126)**

|                                                      | Infant weight growth measures |               |                            |                          | Childhood adiposity measures |                               |                                                      |
|------------------------------------------------------|-------------------------------|---------------|----------------------------|--------------------------|------------------------------|-------------------------------|------------------------------------------------------|
|                                                      | PWV (kg/year)                 | AGEAP (years) | BMIAP (kg/m <sup>2</sup> ) | BMI (kg/m <sup>2</sup> ) | Body fat percentage          | Android/gynoid fat mass ratio | Pre-peritoneal abdominal fat area (cm <sup>2</sup> ) |
| PWV (cm/year)                                        | <b>1</b>                      | -             | -                          | -                        | -                            | -                             | -                                                    |
| AGEAP (years)                                        | -0.02                         | <b>1</b>      | -                          | -                        | -                            | -                             | -                                                    |
| BMIAP (kg/m <sup>2</sup> )                           | 0.68**                        | -0.21**       | <b>1</b>                   | -                        | -                            | -                             | -                                                    |
| BMI (kg/m <sup>2</sup> )                             | 0.33**                        | 0.03          | 0.46**                     | <b>1</b>                 | -                            | -                             | -                                                    |
| Body fat percentage                                  | 0.08**                        | 0.04**        | 0.12**                     | 0.69**                   | <b>1</b>                     | -                             | -                                                    |
| Android/gynoid fat mass ratio                        | 0.14**                        | 0.02          | 0.15**                     | 0.61**                   | 0.65**                       | <b>1</b>                      | -                                                    |
| Pre-peritoneal abdominal fat area (cm <sup>2</sup> ) | 0.11**                        | 0.02          | 0.09**                     | 0.57**                   | 0.63**                       | 0.54**                        | <b>1</b>                                             |

Abbreviations; N: number, PWV: peak weight velocity, AGEAP: age at adiposity peak, BMIAP: body mass index at adiposity peak, BMI: body mass index.

\*P value <0.05, \*\* P value <0.01.

**Table S3. Associations of infant weight growth velocity patterns with adiposity outcomes in absolute values (N=5, 126)**

|                            | Absolute difference in childhood body fat outcomes (95% Confidence Interval) |                           |                               |                                                     |
|----------------------------|------------------------------------------------------------------------------|---------------------------|-------------------------------|-----------------------------------------------------|
|                            | BMI (kg/m <sup>2</sup> )                                                     | Body fat percentage       | Android/gynoid fat mass ratio | ln Pre-peritoneal abdominal area (cm <sup>2</sup> ) |
| <b>Total group</b>         |                                                                              |                           |                               |                                                     |
| PWV (kg/year)              | 0.31 (0.29, 0.34)** ,***                                                     | 0.54 (0.47, 0.62)** ,***  | 0.004 (0.003, 0.005)** ,***   | 0.03 (0.02, 0.04)** ,***                            |
| AgeBMIAP (years)           | 3.42 (2.22, 4.61)** ,***                                                     | 6.80 (3.38, 10.21)** ,*** | 0.04 (-0.01, 0.08) ,***       | 0.24 (-0.12, 0.59)                                  |
| BMIAP (kg/m <sup>2</sup> ) | 1.00 (0.93, 1.06)**                                                          | 1.60 (1.41, 1.80)**       | 0.01 (0.01, 0.02)** ,***      | 0.07 (0.05, 0.09)**                                 |
| <b>Boys</b>                |                                                                              |                           |                               |                                                     |
| PWV (kg/year)              | 0.27 (0.24, 0.30)**                                                          | 0.49 (0.39, 0.59)**       | 0.00 (0.00, 0.00)             | 0.03 (0.02, 0.04)**                                 |
| AgeBMIAP (years)           | 1.68 (0.05, 3.31)*                                                           | 1.81 (-2.88, 6.51)        | -0.03 (-0.09, 0.03)           | -0.14 (-0.62, 0.34)                                 |
| BMIAP (kg/m <sup>2</sup> ) | 0.96 (0.87, 1.05)*                                                           | 1.56 (1.29, 1.83)**       | 0.01 (0.01, 0.01)**           | 0.07 (0.04, 0.10)**                                 |
| <b>Girls</b>               |                                                                              |                           |                               |                                                     |
| PWV (kg/year)              | 0.36 (0.33, 0.41)                                                            | 0.63 (0.51, 0.75)**       | 0.01 (0.00, 0.01)**           | 0.04 (0.03, 0.05)**                                 |
| AgeBMIAP (years)           | 5.2 (3.45, 7.02)**                                                           | 11.77 (6.78, 16.75)**     | 0.10 (0.03, 0.17)**           | 0.60 (0.08, 1.13)*                                  |
| BMIAP (kg/m <sup>2</sup> ) | 1.03 (0.94, 1.12)**                                                          | 1.65 (1.37, 1.93)**       | 0.02 (0.01, 0.02)**           | 0.07 (0.04, 0.10)**                                 |

Abbreviations: BMI: body mass index, PWV: peak weight velocity, AGEAP: age at adiposity peak, BMIAP: body mass index at adiposity peak; Values are linear regression coefficients (95% confidence interval) based on multiple linear regression models and reflect the change in outcome in each infant weight growth characteristics;

Model adjusted for age, sex (total group), age mother, body mass index before pregnancy, parity, marital status, education mother, smoking during pregnancy, use of alcohol during pregnancy, folic acid supplement use, gestational diabetes and gestational hypertensive disorders, paternal body mass index, standard deviation score birth weight, ethnicity child, number of postnatal measurements, duration of breastfeeding, age at introduction of solid foods and watching television. Analyses with fat mass were additionally adjusted for height of the child.

\* P value<0.05, \*\* P value <0.01, \*\*\* P values for interaction with sex <0.05.

**Table S4. Associations of infant weight growth velocity patterns with childhood adiposity outcomes (SDS) adjusted for age and sex only (N=5,126)**

|                                               | <b>SDS difference in childhood body fat outcomes (95% Confidence Interval)</b> |                     |                               |                                   |
|-----------------------------------------------|--------------------------------------------------------------------------------|---------------------|-------------------------------|-----------------------------------|
|                                               | BMI                                                                            | Body fat percentage | Android/gynoid fat mass ratio | Pre-peritoneal abdominal fat area |
| <b>Total group</b>                            |                                                                                |                     |                               |                                   |
| <b>PWV</b> (1 SDS = 2.1 kg/year)              |                                                                                |                     |                               |                                   |
| Model 1                                       | 0.39 (0.36, 0.41)**                                                            | 0.31 (0.28, 0.34)** | 0.19 (0.16, 0.22)**           | 0.23 (0.19, 0.26)**               |
| Model 2                                       | 0.37 (0.34, 0.40)**                                                            | 0.21 (0.18, 0.24)** | 0.14 (0.10, 0.17)**           | 0.13 (0.10, 0.17)**               |
| <b>AGEAP</b> (1 SDS = 0.04 years)             |                                                                                |                     |                               |                                   |
| Model 1                                       | 0.03 (0.01, 0.06)*                                                             | 0.04 (0.01, 0.06)** | 0.02 (-0.01, 0.05)            | 0.01 (-0.02, 0.04)                |
| Model 2                                       | 0.08 (0.06, 0.11)**                                                            | 0.05 (0.03, 0.08)** | 0.03 (-0.01, 0.06)            | 0.02 (-0.01, 0.05)                |
| <b>BMIAP</b> (1 SDS = 0.8 kg/m <sup>2</sup> ) |                                                                                |                     |                               |                                   |
| Model 1                                       | 0.48 (0.46, 0.51)**                                                            | 0.25 (0.22, 0.28)** | 0.17 (0.14, 0.20)**           | 0.14 (0.11, 0.17)**               |
| Model 2                                       | 0.45 (0.43, 0.48)**                                                            | 0.24 (0.21, 0.27)** | 0.17 (0.10, 0.17)**           | 0.11 (0.08, 0.15)**               |

Abbreviations: N: number, SDS: standard deviation scores, BMI: body mass index, PWV: peak weight velocity, AGEAP: age at adiposity peak, BMIAP: body mass index at adiposity peak. Values are linear regression coefficients (95% CI) based on multiple linear regression models and reflect the change in outcome per SD increase in each infant weight growth characteristics. Model 1 adjusted for age, sex. Model 2 is additionally adjusted age mother, body mass index before pregnancy, parity, marital status, education mother, smoking during pregnancy, use of alcohol during pregnancy, folic acid use, gestational diabetes and gestational hypertensive disorders, paternal body mass index, standard deviation score birth weight, ethnicity child, number of postnatal measurements, duration of breast feeding, age at introduction of solid foods and watching television. Analyses with fat mass were additionally adjusted for height of the child.

\* P value <0.05, \*\* P value <0.01.

**Table S5. Interaction with standard deviation score birth weight and gestational age at birth**

| <b>Interaction term</b>                 | <b>P-value</b> |
|-----------------------------------------|----------------|
| <b>Gestational age at birth*PWV</b>     |                |
| BMI (SDS)                               | NI             |
| Body fat percentage (SDS)               | NI             |
| Android/gynoid fat mass ratio (SDS)     | NI             |
| Pre-peritoneal abdominal fat area (SDS) | NI             |
| <b>Gestational age at birth*AGEAP</b>   |                |
| BMI (SDS)                               | 0.021          |
| Body fat percentage (SDS)               | NI             |
| Android/gynoid fat mass ratio (SDS)     | 0.016          |
| Pre-peritoneal abdominal fat area (SDS) | NI             |
| <b>Gestational age at birth*BMIAP</b>   |                |
| BMI (SDS)                               | NI             |
| Body fat percentage (SDS)               | NI             |
| Android/gynoid fat mass ratio (SDS)     | NI             |
| Pre-peritoneal abdominal fat area (SDS) | NI             |
| <b>SDS birth weight*PWV</b>             |                |
| BMI (SDS)                               | 0.008          |
| Body fat percentage (SDS)               | NI             |
| Android/gynoid fat mass ratio (SDS)     | NI             |
| Pre-peritoneal abdominal fat area (SDS) | NI             |
| <b>SDS birth weight*AGEAP</b>           |                |
| BMI (SDS)                               | 0.001          |
| Body fat percentage (SDS)               | 0.047          |
| Android/gynoid fat mass ratio (SDS)     | 0.005          |
| Pre-peritoneal abdominal fat area (SDS) | NI             |
| <b>SDS birth weight*BMIAP</b>           |                |
| BMI (SDS)                               | NI             |
| Body fat percentage (SDS)               | NI             |
| Android/gynoid fat mass ratio (SDS)     | NI             |
| Pre-peritoneal abdominal fat area (SDS) | NI             |

Abbreviations: BMI: body mass index, SDS: standard deviation scores, NI: no significant interaction.

**Table S6. Associations of infant weight growth velocity patterns with adiposity outcomes stratified by gestational age at birth or SDS birth weight (N=5,126)**

|                                 | SDS difference in childhood body fat outcomes (95% Confidence Interval) |                     |                               |                                   |
|---------------------------------|-------------------------------------------------------------------------|---------------------|-------------------------------|-----------------------------------|
|                                 | BMI                                                                     | Body fat percentage | Android/gynoid fat mass ratio | Pre-peritoneal abdominal fat area |
| <b>AGEAP (N=4,702)</b>          |                                                                         |                     |                               |                                   |
| Preterm ( $\leq 37$ weeks)      | 0.09 (-0.03, 0.20)                                                      | NI                  | 0.03 (-0.00, 0.06)            | NI                                |
| Term ( $> 37$ weeks)            | 0.05 (0.03, 0.08)**                                                     | NI                  | 0.12 (-0.01, 0.25)            | NI                                |
| <b>PWV (N=5,120)</b>            |                                                                         |                     |                               |                                   |
| Small for gestational age       | 0.43 (0.34, 0.52)**                                                     | NI                  | NI                            | NI                                |
| Appropriate for gestational age | 0.36 (0.33, 0.39)**                                                     | NI                  | NI                            | NI                                |
| Large for gestational age       | 0.34 (0.27, 0.41)**                                                     | NI                  | NI                            | NI                                |
| <b>AGEAP (N=4,700)</b>          |                                                                         |                     |                               |                                   |
| Small for gestational age       | 0.17 (0.09, 0.25)**                                                     | 0.14 (0.06, 0.22)** | 0.10 (0.00, 0.19)             | NI                                |
| Appropriate for gestational age | 0.06 (0.03, 0.09)**                                                     | 0.05 (0.02, 0.08)** | 0.03 (-0.00, 0.06)            | NI                                |
| Large for gestational age       | 0.02 (-0.06, 0.11)                                                      | -0.02 (-0.08, 0.10) | -0.03 (-0.13, 0.06)           | NI                                |

Abbreviations: N: number, SDS: standard deviation scores; BMI: body mass index, PWV: peak weight velocity, AGEAP: age at adiposity peak, BMIAP: body mass index at adiposity peak, NI: no significant interaction. Values are linear regression coefficients (95% confidence interval) based on multiple linear regression models and reflect the change in outcome in each infant weight growth characteristics; Model adjusted for age, sex, age mother, body mass index before pregnancy, parity, marital status, education mother, smoking during pregnancy, use of alcohol during pregnancy, folic acid supplement use, gestational diabetes and gestational hypertensive disorders, paternal body mass index, standard deviation score birth weight, ethnicity child, number of postnatal measurements, breast feeding, age at introduction of solid foods and watching television. Analyses with fat mass were additionally adjusted for height of the child.

\* P value<0.05, \*\* P value<0.01.
